# Supplementary material for: An APETALA2/ethylene responsive factor transcription factor GmCRF4a regulates plant height and auxin biosynthesis in soybean
Source: Front Plant Sci. 2022 Sep 6;13:983650. doi: 10.3389/fpls.2022.983650 (PMC9485679; doi:10.3389/fpls.2022.983650)
Supplement: Supplementary file 1 [file Table_1.XLSX]

## Sheet: Phylogenetic tree analysis
Gene Name	Taget Gene	P-Value	Score	SubGroup	AOG	symbel
Glyma.U037700	AT4G37750	2.15e-11	58.5	ANT	ANT-AOG11	ANT
Glyma.U022100	AT2G28550	6.37e-127	369	AP2	AP2-AOG2	TOE1/RAP2.7
Glyma.20G215700	AT4G27950	3.05e-39	130	ERFVI	VI-AOG2	ERF066/CRF4
Glyma.20G203700	AT3G23240	1.68e-75	220	ERFIX	IXc-AOG3	ERF092/AtERF1
Glyma.20G203600	AT3G23230	1.18e-49	148	ERFIX	IXc-AOG2	ERF098/TDR1
Glyma.20G203500	AT3G23230	5.92e-45	137	ERFIX	IXc-AOG2	ERF098/TDR1
Glyma.20G197000	AT4G13620	5.13e-69	216	DREBI	Ib-AOG2	ERF062/RAP2.4h
Glyma.20G196400	AT5G47220	4.68e-42	130	ERFIX	IXa-AOG1	ERF101/AtERF2
Glyma.20G195900	AT5G07580	4.2e-42	136	ERFIX	IXb-AOG2	ERF106
Glyma.20G186200	AT1G25560	2.21e-138	391	RAV	RAV-AOG2	RAV2-Like/TEM1/EDF1
Glyma.20G172800	AT1G12890	1.36e-29	100	ERFVIII	VIIIb-AOG4	ERF088
Glyma.20G168500	AT5G61890	1.38e-35	121	ERFX	Xa-AOG2	ERF114/EBE
Glyma.20G155200	AT5G52020	6.01e-48	150	DREB III	IIIb-AOG2	ERF025
Glyma.20G155100	AT5G51990	2e-63	189	DREB III	IIIc-AOG2	ERF028/CBF4/DREB1D
Glyma.20G115300	AT1G68550	8.01e-43	144	ERFVI	VI-L-AOG1	ERF118/CRF10
Glyma.20G070100	AT5G07580	4.94e-44	141	ERFIX	IXb-AOG2	ERF106
Glyma.20G070000	AT5G51190	4.84e-59	180	ERFIX	IXb-AOG1	ERF105
Glyma.20G031000	AT5G19790	5.14e-30	108	ERFV	Vb-AOG5	ERF002/RAP2.11
Glyma.19G262700	AT3G14230	7.93e-51	165	ERFVII	VIIa-AOG4	ERF075/RAP2.2
Glyma.19G256800	AT1G01250	9.29e-57	170	DREB III	IIIa-AOG1	ERF023
Glyma.19G253100	AT4G27950	6.3e-45	148	ERFVI	VI-AOG2	ERF066/CRF4
Glyma.19G248900	AT3G23240	2.23e-61	183	ERFIX	IXc-AOG3	ERF092/AtERF1
Glyma.19G213100	AT2G47520	7.34e-53	161	ERFVII	VIIa-AOG2	ERF071/HRE2
Glyma.19G192400	AT2G36450	3.97e-61	181	DREB III	IIIb-AOG1	ERF024/HRD/HARDY
Glyma.19G178200	AT2G28550	5.59e-113	335	AP2	AP2-AOG2	TOE1/RAP2.7
Glyma.19G164100	AT3G23240	2.07e-58	178	ERFIX	IXc-AOG3	ERF092/AtERF1
Glyma.19G163900	AT3G23240	6.52e-56	170	ERFIX	IXc-AOG3	ERF092/AtERF1
Glyma.19G163800	AT2G31230	3.05e-36	119	ERFIX	IXc-AOG4	ERF093/AtERF15
Glyma.19G163700	AT3G23230	5.64e-42	129	ERFIX	IXc-AOG2	ERF098/TDR1
Glyma.19G142000	AT3G57600	1.74e-89	260	DREB IV	IVb-AOG3	ERF051/DREB2F
Glyma.19G138000	AT2G41710	6.92e-169	474	ANT	ANT-AOG1	AP2.01
Glyma.19G113100	AT5G19790	1.21e-54	170	ERFV	Vb-AOG5	ERF002/RAP2.11
Glyma.19G104200	AT5G61890	3.34e-40	135	ERFX	Xa-AOG2	ERF114/EBE
Glyma.19G035500	AT3G57600	6.67e-76	225	DREB IV	IVb-AOG3	ERF051/DREB2F
Glyma.19G026000	AT5G19790	1.73e-34	121	ERFV	Vb-AOG5	ERF002/RAP2.11
Glyma.18G281400	AT5G13330	9.13e-46	145	ERFX	Xa-AOG2	ERF113/RAP2.6L
Glyma.18G262800	AT5G19790	3.71e-34	120	ERFV	Vb-AOG5	ERF002/RAP2.11
Glyma.18G256000	AT3G54320	1.44e-11	57.8	ANT	ANT-AOG3	WRI1
Glyma.18G252400	AT2G44840	7.48e-37	121	ERFIX	IXa-AOG1	ERF099/AtERF13
Glyma.18G252300	AT2G44840	9.64e-39	126	ERFIX	IXa-AOG1	ERF099/AtERF13
Glyma.18G252200	AT2G44840	1.77e-30	103	ERFIX	IXa-AOG1	ERF099/AtERF13
Glyma.18G244600	AT5G17430	1.79e-118	360	ANT	ANT-AOG8	PLT4/BBM
Glyma.18G206600	AT2G40340	4.13e-45	155	DREB IV	IVa-AOG1	ERF048/DREB2C
Glyma.18G159900	AT4G13040	2.59e-47	149	Soloist	AOG	APD1
Glyma.18G148000	AT1G51190	3.04e-127	373	ANT	ANT-AOG9	PLT2
Glyma.18G144700	AT1G24590	1.16e-42	143	ERFVIII	VIIIb-AOG2	ERF090/ESR2/DRNL
Glyma.18G125200	AT3G54320	8.33e-94	281	ANT	ANT-AOG3	WRI1
Glyma.18G091600	AT1G50640	5.71e-55	168	ERFVIII	VIIIa-AOG1	ERF082/AtERF3
Glyma.18G018200	AT4G39780	1.13e-78	234	DREBI	Ib-AOG3	ERF060/RAP2.4f
Glyma.17G254600	AT1G75490	4.72e-53	165	DREB IV	IVb-AOG1	ERF049/DREB2D
Glyma.17G240100	AT1G46768	1.91e-52	157	DREB II	IIa-AOG1	ERF006/RAP2.1/DEAR6
Glyma.17G219700	AT1G19210	4.26e-40	130	DREB II	IIb-AOG4	ERF017
Glyma.17G216100	AT5G25190	2.5e-79	228	ERFV	Va-AOG1	ERF003/ESE3
Glyma.17G210500	AT5G25390	1.82e-72	211	ERFV	Va-AOG2	ERF005/SHN3
Glyma.17G194100	AT5G11590	4.45e-69	205	DREB III	IIIe-AOG2	ERF041/DREB3/TINY2
Glyma.17G170300	AT4G36920	2.67e-137	397	AP2	AP2-AOG1	AP2
Glyma.17G170100	AT1G68550	1.77e-39	135	ERFVI	VI-L-AOG1	ERF118/CRF10
Glyma.17G169800	AT2G23340	2.04e-55	165	DREB II	IIa-AOG1	ERF008/DEAR3
Glyma.17G158300	AT4G37750	2.47e-15	71.2	ANT	ANT-AOG11	ANT
Glyma.17G145400	AT4G17500	9.16e-87	252	ERFIX	IXa-AOG1	ERF100/AtERF1A
Glyma.17G145300	AT5G47230	1.99e-68	207	ERFIX	IXb-AOG2	ERF102/AtERF5
Glyma.17G143900	AT2G44940	4.31e-60	184	DREB III	IIId-AOG1	ERF034
Glyma.17G131900	AT4G25470	1.23e-55	171	DREB III	IIIc-AOG2	ERF030/CBF2/DREB1C
Glyma.17G131800	AT5G52020	6.01e-47	146	DREB III	IIIb-AOG2	ERF025
Glyma.17G124100	AT5G19790	1.44e-27	99.4	ERFV	Vb-AOG5	ERF002/RAP2.11
Glyma.17G114500	AT1G15360	2.12e-76	223	ERFV	Va-AOG2	ERF001/WIN1/SHN1
Glyma.17G070800	AT1G16060	4.47e-108	313	ANT	ANT-AOG4	WRI3
Glyma.17G062600	AT5G57390	9.84e-145	422	ANT	ANT-AOG5	AIL5/PLT5
Glyma.17G047300	AT1G19210	5.24e-63	186	DREB II	IIb-AOG4	ERF017
Glyma.17G024300	AT5G18560	5.12e-63	197	ERFVIII	VIIIb-AOG5	ERF086/PUCHl
Glyma.16G199000	AT5G51990	3.47e-70	207	DREB III	IIIc-AOG2	ERF028/CBF4/DREB1D
Glyma.16G164800	AT2G33710	6.1e-35	122	ERFX	Xa-AOG2	ERF112
Glyma.16G154100	AT5G19790	1.72e-07	43.9	ERFV	Vb-AOG5	ERF002/RAP2.11
Glyma.16G148700	AT5G13910	2.26e-50	158	ERFVIII	VIIIb-AOG3	ERF085/LEP
Glyma.16G147500	AT5G61890	1.29e-43	140	ERFX	Xa-AOG2	ERF114/EBE
Glyma.16G079600	AT4G27950	6.91e-40	134	ERFVI	VI-AOG2	ERF066/CRF4
Glyma.16G047600	AT5G61890	1.79e-40	133	ERFX	Xa-AOG2	ERF114/EBE
Glyma.16G046300	AT5G13910	6.22e-53	163	ERFVIII	VIIIb-AOG3	ERF085/LEP
Glyma.16G040000	AT5G19790	8.6e-54	168	ERFV	Vb-AOG5	ERF002/RAP2.11
Glyma.16G023800	AT1G01250	6.49e-51	156	DREB III	IIIa-AOG1	ERF023
Glyma.16G012600	AT3G14230	2.19e-61	195	ERFVII	VIIa-AOG4	ERF075/RAP2.2
Glyma.16G007400	AT1G72570	1.15e-142	412	ANT	ANT-AOG7	AIL1
Glyma.15G221600	AT3G54320	3.77e-112	329	ANT	ANT-AOG3	WRI1
Glyma.15G180000	AT1G19210	3.33e-53	162	DREB II	IIb-AOG4	ERF017
Glyma.15G159200	AT3G23230	5.19e-43	131	ERFIX	IXc-AOG2	ERF098/TDR1
Glyma.15G159100	AT3G23230	2.81e-44	135	ERFIX	IXc-AOG2	ERF098/TDR1
Glyma.15G152000	AT3G16770	4.1e-56	172	ERFVII	VIIa-AOG1	ERF072/RAP2.3/AtEBP
Glyma.15G095600	AT5G18560	2.93e-55	176	ERFVIII	VIIIb-AOG5	ERF086/PUCHl
Glyma.15G085400	AT5G19790	1.7e-28	104	ERFV	Vb-AOG5	ERF002/RAP2.11
Glyma.15G079200	AT4G18450	4.69e-47	152	ERFIX	IXc-AOG1	ERF091
Glyma.15G079100	AT5G47220	1.52e-40	133	ERFIX	IXa-AOG1	ERF101/AtERF2
Glyma.15G077100	AT5G44210	1.16e-39	128	ERFVIII	VIIIa-AOG4	ERF080/AtERF9
Glyma.15G077000	AT1G28360	5.92e-49	150	ERFVIII	VIIIa-AOG3	ERF081/AtERF12
Glyma.15G044400	AT2G28550	3.25e-126	369	AP2	AP2-AOG2	TOE1/RAP2.7
Glyma.15G025100	AT2G36450	6.41e-61	181	DREB III	IIIb-AOG1	ERF024/HRD/HARDY
Glyma.15G018400	AT5G11590	2.95e-61	184	DREB III	IIIe-AOG2	ERF041/DREB3/TINY2
Glyma.15G008600	AT1G15360	1.99e-77	223	ERFV	Va-AOG2	ERF001/WIN1/SHN1
Glyma.15G004200	AT5G25190	1.9e-79	227	ERFV	Va-AOG1	ERF003/ESE3
Glyma.14G205600	AT4G27950	1.18e-40	137	ERFVI	VI-AOG2	ERF066/CRF4
Glyma.14G171500	AT1G78080	3.39e-87	258	DREBI	Ib-AOG3	ERF059/RAP2.4/WIND1
Glyma.14G161900	AT3G57600	8.37e-68	204	DREB IV	IVb-AOG3	ERF051/DREB2F
Glyma.14G147500	AT1G21910	2.72e-50	157	DREB II	IIb-AOG1	ERF012/DREB26
Glyma.14G146100	AT5G11590	1.79e-72	214	DREB III	IIIe-AOG2	ERF041/DREB3/TINY2
Glyma.14G123900	AT4G27950	1.14e-57	182	ERFVI	VI-AOG2	ERF066/CRF4
Glyma.14G111600	AT5G25190	1.63e-78	226	ERFV	Va-AOG1	ERF003/ESE3
Glyma.14G106200	AT1G19210	3.48e-41	132	DREB II	IIb-AOG4	ERF017
Glyma.14G089200	AT4G37750	2.25e-148	433	ANT	ANT-AOG11	ANT
Glyma.14G084700	AT1G46768	5.82e-54	161	DREB II	IIa-AOG1	ERF006/RAP2.1/DEAR6
Glyma.14G070000	AT1G75490	1.93e-51	161	DREB IV	IVb-AOG1	ERF049/DREB2D
Glyma.14G057900	AT2G40220	2.96e-44	147	DREB IV	IVb-AOG2	ERF052/ABI4
Glyma.14G056200	AT2G40340	6.54e-73	224	DREB IV	IVa-AOG1	ERF048/DREB2C
Glyma.14G050100	AT1G50640	3.32e-45	143	ERFVIII	VIIIa-AOG1	ERF082/AtERF3
Glyma.14G020100	AT1G50640	3.71e-58	176	ERFVIII	VIIIa-AOG1	ERF082/AtERF3
Glyma.13G369400	AT5G25190	1.76e-78	227	ERFV	Va-AOG1	ERF003/ESE3
Glyma.13G355700	AT5G11590	2.82e-60	182	DREB III	IIIe-AOG2	ERF041/DREB3/TINY2
Glyma.13G329700	AT2G28550	6.54e-123	360	AP2	AP2-AOG2	TOE1/RAP2.7
Glyma.13G318500	AT4G25470	2.05e-56	172	DREB III	IIIc-AOG2	ERF030/CBF2/DREB1C
Glyma.13G304300	AT2G40340	3.24e-53	166	DREB IV	IVa-AOG1	ERF048/DREB2C
Glyma.13G298600	AT2G20880	1.16e-58	188	DREBI	Ia-AOG1	ERF053
Glyma.13G274100	AT3G15210	4.21e-51	157	ERFVIII	VIIIa-AOG4	ERF078/RAP2.5/AtERF4
Glyma.13G236600	AT1G28360	5.58e-50	152	ERFVIII	VIIIa-AOG3	ERF081/AtERF12
Glyma.13G236500	AT5G44210	5.13e-42	134	ERFVIII	VIIIa-AOG4	ERF080/AtERF9
Glyma.13G233900	AT4G17500	5.05e-36	118	ERFIX	IXa-AOG1	ERF100/AtERF1A
Glyma.13G233800	AT4G18450	3.26e-48	155	ERFIX	IXc-AOG1	ERF091
Glyma.13G227100	AT5G19790	1.34e-27	104	ERFV	Vb-AOG5	ERF002/RAP2.11
Glyma.13G216900	AT5G18560	1.59e-55	177	ERFVIII	VIIIb-AOG5	ERF086/PUCHl
Glyma.13G166700	AT1G15360	1.66e-77	225	ERFV	Va-AOG2	ERF001/WIN1/SHN1
Glyma.13G152000	AT5G51990	2.04e-44	140	DREB III	IIIc-AOG2	ERF028/CBF4/DREB1D
Glyma.13G151900	AT2G36450	7.04e-52	158	DREB III	IIIb-AOG1	ERF024/HRD/HARDY
Glyma.13G123100	AT3G23240	1.28e-55	171	ERFIX	IXc-AOG3	ERF092/AtERF1
Glyma.13G123000	AT3G23230	4.44e-41	127	ERFIX	IXc-AOG2	ERF098/TDR1
Glyma.13G122900	AT3G23240	5.87e-55	166	ERFIX	IXc-AOG3	ERF092/AtERF1
Glyma.13G122800	AT3G23240	1.37e-54	166	ERFIX	IXc-AOG3	ERF092/AtERF1
Glyma.13G122700	AT3G23240	3.67e-56	171	ERFIX	IXc-AOG3	ERF092/AtERF1
Glyma.13G122600	AT3G23240	3.5e-58	176	ERFIX	IXc-AOG3	ERF092/AtERF1
Glyma.13G122500	AT3G23230	2.6e-44	135	ERFIX	IXc-AOG2	ERF098/TDR1
Glyma.13G112400	AT1G19210	7.98e-59	176	DREB II	IIb-AOG4	ERF017
Glyma.13G096900	AT5G57390	1.17e-150	436	ANT	ANT-AOG5	AIL5/PLT5
Glyma.13G088100	AT1G78080	5.51e-87	257	DREBI	Ib-AOG3	ERF059/RAP2.4/WIND1
Glyma.13G081600	AT1G21910	2.5e-47	150	DREB II	IIb-AOG1	ERF012/DREB26
Glyma.13G060600	AT5G19790	1.53e-34	121	ERFV	Vb-AOG5	ERF002/RAP2.11
Glyma.13G040400	AT4G27950	5.76e-53	171	ERFVI	VI-AOG2	ERF066/CRF4
Glyma.12G226600	AT3G15210	1.86e-51	158	ERFVIII	VIIIa-AOG4	ERF078/RAP2.5/AtERF4
Glyma.12G203100	AT2G20880	1.05e-60	193	DREBI	Ia-AOG1	ERF053
Glyma.12G197700	AT2G40340	7.14e-53	166	DREB IV	IVa-AOG1	ERF048/DREB2C
Glyma.12G182400	AT4G25470	2.04e-56	173	DREB III	IIIc-AOG2	ERF030/CBF2/DREB1C
Glyma.12G182200	AT5G51990	5.54e-49	153	DREB III	IIIc-AOG2	ERF028/CBF4/DREB1D
Glyma.12G162700	AT5G44210	1.09e-32	107	ERFVIII	VIIIa-AOG4	ERF080/AtERF9
Glyma.12G117000	AT5G44210	2.29e-51	157	ERFVIII	VIIIa-AOG4	ERF080/AtERF9
Glyma.12G110400	AT2G20880	3.34e-65	204	DREBI	Ia-AOG1	ERF053
Glyma.12G103100	AT2G40340	7.95e-50	158	DREB IV	IVa-AOG1	ERF048/DREB2C
Glyma.12G086200	AT5G51990	1.43e-52	162	DREB III	IIIc-AOG2	ERF028/CBF4/DREB1D
Glyma.12G073300	AT2G28550	1.62e-140	405	AP2	AP2-AOG2	TOE1/RAP2.7
Glyma.12G056300	AT1G51190	0	655	ANT	ANT-AOG9	PLT2
Glyma.11G239200	AT1G78080	4.48e-76	229	DREBI	Ib-AOG3	ERF059/RAP2.4/WIND1
Glyma.11G199300	AT4G27950	8.95e-39	131	ERFVI	VI-AOG2	ERF066/CRF4
Glyma.11G188200	AT4G25490	2.42e-52	162	DREB III	IIIc-AOG2	ERF029/CBF1/DREB1B
Glyma.11G131900	AT1G51190	0	627	ANT	ANT-AOG9	PLT2
Glyma.11G053800	AT4G36920	1.92e-124	363	AP2	AP2-AOG1	AP2
Glyma.11G053600	AT5G67190	1.8e-58	174	DREB II	IIa-AOG1	ERF010/DEAR2
Glyma.11G045800	AT4G37750	7.99e-139	409	ANT	ANT-AOG11	ANT
Glyma.11G036500	AT4G17500	7.95e-81	238	ERFIX	IXa-AOG1	ERF100/AtERF1A
Glyma.11G036400	AT5G47230	2.45e-68	207	ERFIX	IXb-AOG2	ERF102/AtERF5
Glyma.11G035100	AT5G11590	9.68e-53	162	DREB III	IIIe-AOG2	ERF041/DREB3/TINY2
Glyma.11G019000	AT4G23750	1.14e-54	174	ERFVI	VI-AOG2	ERF064/CRF2/TMO3
Glyma.11G018100	AT1G64380	2.82e-67	207	DREBI	Ib-AOG1	ERF061/RAP2.4g
Glyma.11G014800	AT1G71520	1.48e-42	132	DREB II	IIc-AOG1	ERF020
Glyma.11G014200	AT1G71450	1.26e-68	200	DREB III	IIIa-AOG2	ERF021/FUF1
Glyma.10G274600	AT1G68550	4.24e-46	153	ERFVI	VI-L-AOG1	ERF118/CRF10
Glyma.10G239400	AT5G51990	2.07e-62	187	DREB III	IIIc-AOG2	ERF028/CBF4/DREB1D
Glyma.10G239300	AT5G52020	3.1e-47	148	DREB III	IIIb-AOG2	ERF025
Glyma.10G223200	AT5G61890	1.25e-35	121	ERFX	Xa-AOG2	ERF114/EBE
Glyma.10G219000	AT1G12890	4.59e-32	107	ERFVIII	VIIIb-AOG4	ERF088
Glyma.10G204400	AT1G25560	4.72e-133	377	RAV	RAV-AOG2	RAV2-Like/TEM1/EDF1
Glyma.10G194200	AT5G07580	3.19e-41	134	ERFIX	IXb-AOG2	ERF106
Glyma.10G193400	AT4G13620	2.81e-72	224	DREBI	Ib-AOG2	ERF062/RAP2.4h
Glyma.10G187000	AT3G23230	3.86e-45	137	ERFIX	IXc-AOG2	ERF098/TDR1
Glyma.10G186900	AT3G23230	1.31e-51	154	ERFIX	IXc-AOG2	ERF098/TDR1
Glyma.10G186800	AT3G23240	1.27e-77	226	ERFIX	IXc-AOG3	ERF092/AtERF1
Glyma.10G171400	AT5G17430	5.12e-130	385	ANT	ANT-AOG8	PLT4/BBM
Glyma.10G119100	AT5G07580	4.76e-44	142	ERFIX	IXb-AOG2	ERF106
Glyma.10G118900	AT5G51190	3.1e-55	171	ERFIX	IXb-AOG1	ERF105
Glyma.10G116600	AT4G36920	2.22e-53	176	AP2	AP2-AOG1	AP2
Glyma.10G099800	AT3G57600	1.6e-82	244	DREB IV	IVb-AOG3	ERF051/DREB2F
Glyma.10G067000	AT4G25490	1.94e-43	137	DREB III	IIIc-AOG2	ERF029/CBF1/DREB1B
Glyma.10G066900	AT2G36450	1.46e-51	157	DREB III	IIIb-AOG1	ERF024/HRD/HARDY
Glyma.10G061400	AT5G44210	1.16e-37	118	ERFVIII	VIIIa-AOG4	ERF080/AtERF9
Glyma.10G036700	AT3G23240	3.75e-56	173	ERFIX	IXc-AOG3	ERF092/AtERF1
Glyma.10G036600	AT3G23230	1.12e-39	124	ERFIX	IXc-AOG2	ERF098/TDR1
Glyma.10G036300	AT3G23240	6.72e-54	163	ERFIX	IXc-AOG3	ERF092/AtERF1
Glyma.10G036200	AT3G23230	4.27e-44	134	ERFIX	IXc-AOG2	ERF098/TDR1
Glyma.10G016500	AT3G16770	1.43e-44	145	ERFVII	VIIa-AOG1	ERF072/RAP2.3/AtEBP
Glyma.10G007100	AT3G23230	5.24e-51	152	ERFIX	IXc-AOG2	ERF098/TDR1
Glyma.10G007000	AT3G23240	7.19e-64	189	ERFIX	IXc-AOG3	ERF092/AtERF1
Glyma.09G248200	AT5G17430	4.1e-148	437	ANT	ANT-AOG8	PLT4/BBM
Glyma.09G242600	AT2G44840	1.41e-37	123	ERFIX	IXa-AOG1	ERF099/AtERF13
Glyma.09G240400	AT3G54320	7.85e-96	286	ANT	ANT-AOG3	WRI1
Glyma.09G233800	AT5G11590	6.43e-35	116	DREB III	IIIe-AOG2	ERF041/DREB3/TINY2
Glyma.09G199800	AT5G10510	0	521	ANT	ANT-AOG6	AIL6/PLT3
Glyma.09G194800	AT5G11590	6.81e-60	181	DREB III	IIIe-AOG2	ERF041/DREB3/TINY2
Glyma.09G147200	AT5G51990	1.69e-71	214	DREB III	IIIc-AOG2	ERF028/CBF4/DREB1D
Glyma.09G072000	AT1G19210	4.68e-52	159	DREB II	IIb-AOG4	ERF017
Glyma.09G053000	AT3G23230	1.36e-43	133	ERFIX	IXc-AOG2	ERF098/TDR1
Glyma.09G052900	AT3G23230	1.58e-40	125	ERFIX	IXc-AOG2	ERF098/TDR1
Glyma.09G052800	AT3G23230	6.98e-37	115	ERFIX	IXc-AOG2	ERF098/TDR1
Glyma.09G041500	AT3G16770	1.98e-51	160	ERFVII	VIIa-AOG1	ERF072/RAP2.3/AtEBP
Glyma.08G348300	AT4G13040	4.2e-47	149	Soloist	AOG	APD1
Glyma.08G320700	AT1G50640	1.86e-57	174	ERFVIII	VIIIa-AOG1	ERF082/AtERF3
Glyma.08G297000	AT3G54320	1.87e-93	281	ANT	ANT-AOG3	WRI1
Glyma.08G281900	AT1G24590	2.82e-44	147	ERFVIII	VIIIb-AOG2	ERF090/ESR2/DRNL
Glyma.08G279000	AT5G65510	4.42e-131	381	ANT	ANT-AOG6	AIL7/PLT7
Glyma.08G278800	AT5G44210	3.03e-34	113	ERFVIII	VIIIa-AOG4	ERF080/AtERF9
Glyma.08G261500	AT1G68550	1.89e-43	146	ERFVI	VI-L-AOG1	ERF118/CRF10
Glyma.08G257300	AT5G61890	1.03e-46	150	ERFX	Xa-AOG2	ERF114/EBE
Glyma.08G227700	AT3G54320	5.42e-113	332	ANT	ANT-AOG3	WRI1
Glyma.08G220800	AT1G16060	5.15e-126	357	ANT	ANT-AOG4	WRI3
Glyma.08G216600	AT5G25190	6.95e-75	216	ERFV	Va-AOG1	ERF003/ESE3
Glyma.08G215700	AT1G80580	2.1e-32	110	ERFVIII	VIIIb-AOG1	ERF084
Glyma.08G211600	AT1G15360	6.51e-81	233	ERFV	Va-AOG2	ERF001/WIN1/SHN1
Glyma.08G202300	AT5G11590	1e-61	187	DREB III	IIIe-AOG2	ERF041/DREB3/TINY2
Glyma.08G149200	AT1G68550	1.87e-45	150	ERFVI	VI-L-AOG1	ERF118/CRF10
Glyma.08G145300	AT5G61890	1.04e-34	119	ERFX	Xa-AOG2	ERF114/EBE
Glyma.08G137600	AT4G39780	3.7e-84	248	DREBI	Ib-AOG3	ERF060/RAP2.4f
Glyma.08G040900	AT2G46310	1.23e-18	73.6	ERFVI	VI-AOG2	ERF068/CRF5
Glyma.08G035000	AT5G11590	3.99e-59	180	DREB III	IIIe-AOG2	ERF041/DREB3/TINY2
Glyma.08G020900	AT4G23750	2.48e-57	181	ERFVI	VI-AOG2	ERF064/CRF2/TMO3
Glyma.07G250100	AT5G18560	8.53e-63	197	ERFVIII	VIIIb-AOG5	ERF086/PUCHl
Glyma.07G212400	AT4G34410	3.27e-38	127	ERFX	Xb-L-AOG1	ERF109/RRTF1
Glyma.07G199700	AT5G44210	1.57e-18	73.2	ERFVIII	VIIIa-AOG4	ERF080/AtERF9
Glyma.07G156200	AT2G40340	2.72e-46	154	DREB IV	IVa-AOG1	ERF048/DREB2C
Glyma.07G114300	AT2G44840	8.48e-61	184	ERFIX	IXa-AOG1	ERF099/AtERF13
Glyma.07G114000	AT5G47220	5.27e-40	130	ERFIX	IXa-AOG1	ERF101/AtERF2
Glyma.07G113800	AT2G44840	5.16e-43	135	ERFIX	IXa-AOG1	ERF099/AtERF13
Glyma.07G110000	AT2G44940	1.72e-69	209	DREB III	IIId-AOG1	ERF034
Glyma.07G091100	AT1G68550	3.63e-26	98.6	ERFVI	VI-L-AOG1	ERF118/CRF10
Glyma.07G078600	AT5G19790	9.21e-28	102	ERFV	Vb-AOG5	ERF002/RAP2.11
Glyma.07G055000	AT1G01250	8.46e-51	155	DREB III	IIIa-AOG1	ERF023
Glyma.07G044300	AT1G53910	5.32e-59	189	ERFVII	VIIa-AOG4	ERF074/RAP2.12
Glyma.07G038200	AT1G72570	9.69e-144	415	ANT	ANT-AOG7	AIL1
Glyma.07G031200	AT1G15360	3.27e-82	235	ERFV	Va-AOG2	ERF001/WIN1/SHN1
Glyma.07G027000	AT1G80580	9.17e-31	106	ERFVIII	VIIIb-AOG1	ERF084
Glyma.07G025800	AT5G25190	2.28e-76	220	ERFV	Va-AOG1	ERF003/ESE3
Glyma.07G021000	AT1G16060	1.06e-127	360	ANT	ANT-AOG4	WRI3
Glyma.07G017300	AT5G11590	2.29e-62	187	DREB III	IIIe-AOG2	ERF041/DREB3/TINY2
Glyma.06G301300	AT2G40350	3.79e-50	153	DREB IV	IVa-AOG1	ERF047/DREB2H
Glyma.06G295300	AT4G28140	1.34e-65	204	DREBI	Ia-AOG1	ERF054
Glyma.06G290000	AT5G44210	1.19e-50	156	ERFVIII	VIIIa-AOG4	ERF080/AtERF9
Glyma.06G236400	AT3G15210	1.33e-50	155	ERFVIII	VIIIa-AOG4	ERF078/RAP2.5/AtERF4
Glyma.06G225200	AT1G16060	8.36e-117	335	ANT	ANT-AOG4	WRI3
Glyma.06G221800	AT1G15360	1.77e-74	217	ERFV	Va-AOG2	ERF001/WIN1/SHN1
Glyma.06G163700	AT5G61890	3.47e-62	189	ERFX	Xa-AOG2	ERF114/EBE
Glyma.06G148400	AT5G61890	2.49e-36	124	ERFX	Xa-AOG2	ERF114/EBE
Glyma.06G125100	AT4G27950	2.33e-57	182	ERFVI	VI-AOG2	ERF066/CRF4
Glyma.06G111300	AT1G21910	1.84e-49	155	DREB II	IIb-AOG1	ERF012/DREB26
Glyma.06G105000	AT1G78080	4.96e-104	300	DREBI	Ib-AOG3	ERF059/RAP2.4/WIND1
Glyma.06G085700	AT5G11590	1.84e-72	212	DREB III	IIIe-AOG2	ERF041/DREB3/TINY2
Glyma.06G068800	AT5G25390	1.05e-79	228	ERFV	Va-AOG2	ERF005/SHN3
Glyma.06G064000	AT5G25190	1.32e-83	238	ERFV	Va-AOG1	ERF003/ESE3
Glyma.06G058400	AT1G74930	2.07e-44	142	DREB II	IIb-AOG4	ERF018/ORA47
Glyma.06G049200	AT4G37750	5.64e-164	475	ANT	ANT-AOG11	ANT
Glyma.06G042100	AT1G46768	1.16e-53	160	DREB II	IIa-AOG1	ERF006/RAP2.1/DEAR6
Glyma.06G028300	AT1G75490	3.98e-52	161	DREB IV	IVb-AOG1	ERF049/DREB2D
Glyma.05G228100	AT5G11590	1.64e-56	172	DREB III	IIIe-AOG2	ERF041/DREB3/TINY2
Glyma.05G214400	AT4G23750	3.05e-57	182	ERFVI	VI-AOG2	ERF064/CRF2/TMO3
Glyma.05G200100	AT5G61890	6.02e-38	121	ERFX	Xa-AOG2	ERF114/EBE
Glyma.05G186700	AT5G61890	1.62e-34	120	ERFX	Xa-AOG2	ERF114/EBE
Glyma.05G179900	AT4G39780	1.04e-82	244	DREBI	Ib-AOG3	ERF060/RAP2.4f
Glyma.05G157400	AT5G19790	2.47e-38	127	ERFV	Vb-AOG5	ERF002/RAP2.11
Glyma.05G108600	AT4G37750	3.79e-08	48.1	ANT	ANT-AOG11	ANT
Glyma.05G092800	AT3G50260	1.75e-54	162	DREB II	IIa-AOG1	ERF011/DEAR1/CEJ1
Glyma.05G091200	AT4G36920	9.71e-141	406	AP2	AP2-AOG1	AP2
Glyma.05G063600	AT4G17500	3.82e-85	248	ERFIX	IXa-AOG1	ERF100/AtERF1A
Glyma.05G063500	AT5G47230	4.74e-68	206	ERFIX	IXb-AOG2	ERF102/AtERF5
Glyma.05G062100	AT2G44940	5.67e-62	189	DREB III	IIId-AOG1	ERF034
Glyma.05G049900	AT1G12610	7.13e-56	171	DREB III	IIIc-AOG2	ERF033/DDF1/DREB1F
Glyma.05G049800	AT5G52020	2.13e-48	150	DREB III	IIIb-AOG2	ERF025
Glyma.05G015900	AT5G19790	4.86e-29	102	ERFV	Vb-AOG5	ERF002/RAP2.11
Glyma.04G251400	AT1G21910	3.61e-49	157	DREB II	IIb-AOG1	ERF012/DREB26
Glyma.04G238700	AT4G27950	8.42e-56	177	ERFVI	VI-AOG2	ERF066/CRF4
Glyma.04G217400	AT5G61890	2.53e-37	125	ERFX	Xa-AOG2	ERF114/EBE
Glyma.04G201900	AT5G61890	3.29e-63	192	ERFX	Xa-AOG2	ERF114/EBE
Glyma.04G201700	AT5G61890	2.96e-44	141	ERFX	Xa-AOG2	ERF114/EBE
Glyma.04G154900	AT1G16060	6.74e-118	338	ANT	ANT-AOG4	WRI3
Glyma.04G151100	AT4G27950	1.99e-27	100	ERFVI	VI-AOG2	ERF066/CRF4
Glyma.04G147500	AT1G15360	1.53e-75	219	ERFV	Va-AOG2	ERF001/WIN1/SHN1
Glyma.04G103900	AT1G78080	8.56e-101	293	DREBI	Ib-AOG3	ERF059/RAP2.4/WIND1
Glyma.04G084000	AT5G11590	4.09e-74	216	DREB III	IIIe-AOG2	ERF041/DREB3/TINY2
Glyma.04G067200	AT5G25390	5.86e-82	234	ERFV	Va-AOG2	ERF005/SHN3
Glyma.04G062900	AT5G25190	1.17e-83	238	ERFV	Va-AOG1	ERF003/ESE3
Glyma.04G057700	AT1G74930	6.1e-44	141	DREB II	IIb-AOG4	ERF018/ORA47
Glyma.04G047900	AT4G37750	2.18e-163	473	ANT	ANT-AOG11	ANT
Glyma.04G041200	AT1G46768	1.37e-52	158	DREB II	IIa-AOG1	ERF006/RAP2.1/DEAR6
Glyma.04G028100	AT1G75490	5.57e-56	171	DREB IV	IVb-AOG1	ERF049/DREB2D
Glyma.03G263700	AT1G53910	1.03e-64	202	ERFVII	VIIa-AOG4	ERF074/RAP2.12
Glyma.03G258200	AT1G01250	5.03e-57	171	DREB III	IIIa-AOG1	ERF023
Glyma.03G255500	AT4G27950	7.7e-46	151	ERFVI	VI-AOG2	ERF066/CRF4
Glyma.03G191800	AT2G36450	1.07e-61	182	DREB III	IIIb-AOG1	ERF024/HRD/HARDY
Glyma.03G177500	AT2G28550	1.22e-113	335	AP2	AP2-AOG2	TOE1/RAP2.7
Glyma.03G162700	AT2G31230	1.16e-57	176	ERFIX	IXc-AOG4	ERF093/AtERF15
Glyma.03G162600	AT3G23230	1.07e-39	124	ERFIX	IXc-AOG2	ERF098/TDR1
Glyma.03G162500	AT2G31230	1.84e-47	150	ERFIX	IXc-AOG4	ERF093/AtERF15
Glyma.03G162400	AT3G23230	2.28e-25	85.9	ERFIX	IXc-AOG2	ERF098/TDR1
Glyma.03G159800	AT1G50640	2.3e-33	111	ERFVIII	VIIIa-AOG1	ERF082/AtERF3
Glyma.03G140800	AT1G51190	8.12e-21	82.8	ANT	ANT-AOG9	PLT2
Glyma.03G138900	AT3G57600	8.78e-92	266	DREB IV	IVb-AOG3	ERF051/DREB2F
Glyma.03G136100	AT2G41710	3.93e-169	475	ANT	ANT-AOG1	AP2.01
Glyma.03G116700	AT2G44940	3.51e-68	207	DREB III	IIId-AOG1	ERF034
Glyma.03G112800	AT2G44840	1.55e-40	129	ERFIX	IXa-AOG1	ERF099/AtERF13
Glyma.03G112700	AT2G44840	2.89e-40	130	ERFIX	IXa-AOG1	ERF099/AtERF13
Glyma.03G112600	AT2G44840	7.95e-26	91.3	ERFIX	IXa-AOG1	ERF099/AtERF13
Glyma.03G112400	AT2G44840	1.08e-37	123	ERFIX	IXa-AOG1	ERF099/AtERF13
Glyma.03G112100	AT2G44840	3.4e-36	119	ERFIX	IXa-AOG1	ERF099/AtERF13
Glyma.03G112000	AT2G44840	1.17e-35	118	ERFIX	IXa-AOG1	ERF099/AtERF13
Glyma.03G111700	AT2G44840	6.79e-62	185	ERFIX	IXa-AOG1	ERF099/AtERF13
Glyma.03G094700	AT4G27950	5.57e-43	143	ERFVI	VI-AOG2	ERF066/CRF4
Glyma.03G017300	AT5G19790	8.36e-28	102	ERFV	Vb-AOG5	ERF002/RAP2.11
Glyma.02G294100	AT3G20310	6.47e-53	164	ERFVIII	VIIIa-AOG1	ERF083/AtERF7
Glyma.02G267400	AT1G50640	2.38e-43	138	ERFVIII	VIIIa-AOG1	ERF082/AtERF3
Glyma.02G264700	AT2G40220	1.03e-45	151	DREB IV	IVb-AOG2	ERF052/ABI4
Glyma.02G261700	AT2G40340	8.26e-75	229	DREB IV	IVa-AOG1	ERF048/DREB2C
Glyma.02G236800	AT4G27950	8.89e-44	144	ERFVI	VI-AOG2	ERF066/CRF4
Glyma.02G207100	AT1G16060	6.48e-111	321	ANT	ANT-AOG4	WRI3
Glyma.02G185200	AT2G41710	9.61e-144	412	ANT	ANT-AOG1	AP2.01
Glyma.02G181600	AT3G57600	3.44e-83	245	DREB IV	IVb-AOG3	ERF051/DREB2F
Glyma.02G179500	AT5G65510	1.01e-24	97.8	ANT	ANT-AOG6	AIL7/PLT7
Glyma.02G132500	AT4G34410	4.37e-32	110	ERFX	Xb-L-AOG1	ERF109/RRTF1
Glyma.02G099500	AT1G25560	5.64e-149	419	RAV	RAV-AOG2	RAV2-Like/TEM1/EDF1
Glyma.02G087400	AT2G28550	4.48e-57	187	AP2	AP2-AOG2	TOE1/RAP2.7
Glyma.02G080200	AT2G33710	1.93e-34	122	ERFX	Xa-AOG2	ERF112
Glyma.02G072800	AT5G19790	7.44e-08	45.1	ERFV	Vb-AOG5	ERF002/RAP2.11
Glyma.02G067600	AT5G13910	6.26e-54	167	ERFVIII	VIIIb-AOG3	ERF085/LEP
Glyma.02G066200	AT5G61890	2.6e-42	137	ERFX	Xa-AOG2	ERF114/EBE
Glyma.02G039300	AT1G24590	2.05e-40	138	ERFVIII	VIIIb-AOG2	ERF090/ESR2/DRNL
Glyma.02G016100	AT3G16770	5.66e-46	149	ERFVII	VIIa-AOG1	ERF072/RAP2.3/AtEBP
Glyma.02G006300	AT3G23230	9.98e-41	127	ERFIX	IXc-AOG2	ERF098/TDR1
Glyma.02G006200	AT3G23240	6.69e-70	205	ERFIX	IXc-AOG3	ERF092/AtERF1
Glyma.01G232000	AT1G71520	1.07e-40	127	DREB II	IIc-AOG1	ERF020
Glyma.01G231200	AT1G71450	7.13e-68	198	DREB III	IIIa-AOG2	ERF021/FUF1
Glyma.01G231000	AT1G71450	6.49e-54	164	DREB III	IIIa-AOG2	ERF021/FUF1
Glyma.01G225000	AT1G64380	3.32e-69	212	DREBI	Ib-AOG1	ERF061/RAP2.4g
Glyma.01G224100	AT4G23750	1.36e-53	171	ERFVI	VI-AOG2	ERF064/CRF2/TMO3
Glyma.01G216200	AT5G52020	2.5e-46	145	DREB III	IIIb-AOG2	ERF025
Glyma.01G216000	AT1G12610	6.62e-62	186	DREB III	IIIc-AOG2	ERF033/DDF1/DREB1F
Glyma.01G206700	AT5G47230	6.79e-70	211	ERFIX	IXb-AOG2	ERF102/AtERF5
Glyma.01G206600	AT4G17500	2.02e-84	247	ERFIX	IXa-AOG1	ERF100/AtERF1A
Glyma.01G195900	AT4G37750	8.64e-140	411	ANT	ANT-AOG11	ANT
Glyma.01G188600	AT3G50260	3.99e-56	167	DREB II	IIa-AOG1	ERF011/DEAR1/CEJ1
Glyma.01G188400	AT4G36920	8.42e-141	405	AP2	AP2-AOG1	AP2
Glyma.01G147600	AT5G11590	2.01e-61	185	DREB III	IIIe-AOG2	ERF041/DREB3/TINY2
Glyma.01G087500	AT1G25560	5.63e-155	434	RAV	RAV-AOG2	RAV2-Like/TEM1/EDF1
Glyma.01G081100	AT1G68550	3.07e-40	138	ERFVI	VI-L-AOG1	ERF118/CRF10
Glyma.01G074200	AT2G44940	1.15e-69	210	DREB III	IIId-AOG1	ERF034
Glyma.01G025400	AT1G24590	9.46e-43	144	ERFVIII	VIIIb-AOG2	ERF090/ESR2/DRNL
Glyma.01G022500	AT5G10510	0	531	ANT	ANT-AOG6	AIL6/PLT3
AT5G67190	NA	NA	NA	DREB II	IIa-AOG1	ERF010/DEAR2
AT5G67180	NA	NA	NA	AP2	AP2-AOG1	TOE3/EAT
AT5G67010	NA	NA	NA	ERFX	Xb-L-AOG1	ERF121
AT5G67000	NA	NA	NA	ERFX	Xb-L-AOG1	ERF122
AT5G65510	NA	NA	NA	ANT	ANT-AOG6	AIL7/PLT7
AT5G65130	NA	NA	NA	DREBI	Ib-AOG3	ERF057/RAP2.4e/WIND4
AT5G64750	NA	NA	NA	ERFX	Xa-AOG1	ERF111
AT5G61890	NA	NA	NA	ERFX	Xa-AOG2	ERF114/EBE
AT5G61600	NA	NA	NA	ERFIX	IXb-AOG1	ERF104
AT5G61590	NA	NA	NA	ERFIX	IXb-AOG2	ERF107/DEWAX
AT5G60120	NA	NA	NA	AP2	AP2-AOG2	TOE2
AT5G57390	NA	NA	NA	ANT	ANT-AOG5	AIL5/PLT5
AT5G53290	NA	NA	NA	ERFVI	VI-AOG2	ERF065/CRF3
AT5G52020	NA	NA	NA	DREB III	IIIb-AOG2	ERF025
AT5G51990	NA	NA	NA	DREB III	IIIc-AOG2	ERF028/CBF4/DREB1D
AT5G51190	NA	NA	NA	ERFIX	IXb-AOG1	ERF105
AT5G50080	NA	NA	NA	ERFX	Xa-AOG1	ERF110
AT5G47230	NA	NA	NA	ERFIX	IXb-AOG2	ERF102/AtERF5
AT5G47220	NA	NA	NA	ERFIX	IXa-AOG1	ERF101/AtERF2
AT5G44210	NA	NA	NA	ERFVIII	VIIIa-AOG4	ERF080/AtERF9
AT5G43410	NA	NA	NA	ERFIX	IXc-AOG2	ERF096
AT5G25810	NA	NA	NA	DREB III	IIIe-AOG2	ERF040/TINY/TNY
AT5G25390	NA	NA	NA	ERFV	Va-AOG2	ERF005/SHN3
AT5G25190	NA	NA	NA	ERFV	Va-AOG1	ERF003/ESE3
AT5G21960	NA	NA	NA	DREB II	IIb-AOG4	ERF016
AT5G19790	NA	NA	NA	ERFV	Vb-AOG5	ERF002/RAP2.11
AT5G18560	NA	NA	NA	ERFVIII	VIIIb-AOG5	ERF086/PUCHl
AT5G18450	NA	NA	NA	DREB IV	IVb-AOG1	ERF050/DREB2G
AT5G17430	NA	NA	NA	ANT	ANT-AOG8	PLT4/BBM
AT5G13910	NA	NA	NA	ERFVIII	VIIIb-AOG3	ERF085/LEP
AT5G13330	NA	NA	NA	ERFX	Xa-AOG2	ERF113/RAP2.6L
AT5G11590	NA	NA	NA	DREB III	IIIe-AOG2	ERF041/DREB3/TINY2
AT5G11190	NA	NA	NA	ERFV	Va-AOG2	ERF004/SHN2
AT5G10510	NA	NA	NA	ANT	ANT-AOG6	AIL6/PLT3
AT5G07580	NA	NA	NA	ERFIX	IXb-AOG2	ERF106
AT5G07310	NA	NA	NA	ERFX	Xa-AOG2	ERF115
AT5G05410	NA	NA	NA	DREB IV	IVa-AOG1	ERF045/
AT4G39780	NA	NA	NA	DREBI	Ib-AOG3	ERF060/RAP2.4f
AT4G37750	NA	NA	NA	ANT	ANT-AOG11	ANT
AT4G36920	NA	NA	NA	AP2	AP2-AOG1	AP2
AT4G36900	NA	NA	NA	DREB II	IIa-AOG1	ERF009/RAP2.10/DEAR4
AT4G34410	NA	NA	NA	ERFX	Xb-L-AOG1	ERF109/RRTF1
AT4G32800	NA	NA	NA	DREB III	IIIe-AOG1	ERF043
AT4G31060	NA	NA	NA	DREB II	IIb-AOG3	ERF015
AT4G28140	NA	NA	NA	DREBI	Ia-AOG1	ERF054
AT4G27950	NA	NA	NA	ERFVI	VI-AOG2	ERF066/CRF4
AT4G25490	NA	NA	NA	DREB III	IIIc-AOG2	ERF029/CBF1/DREB1B
AT4G25480	NA	NA	NA	DREB III	IIIc-AOG2	ERF031/CBF3/DREB1A
AT4G25470	NA	NA	NA	DREB III	IIIc-AOG2	ERF030/CBF2/DREB1C
AT4G23750	NA	NA	NA	ERFVI	VI-AOG2	ERF064/CRF2/TMO3
AT4G18450	NA	NA	NA	ERFIX	IXc-AOG1	ERF091
AT4G17500	NA	NA	NA	ERFIX	IXa-AOG1	ERF100/AtERF1A
AT4G17490	NA	NA	NA	ERFIX	IXb-AOG2	ERF103/AtERF6
AT4G16750	NA	NA	NA	DREB III	IIId-AOG1	ERF039
AT4G13620	NA	NA	NA	DREBI	Ib-AOG2	ERF062/RAP2.4h
AT4G13040	NA	NA	NA	Soloist	AOG	APD1
AT4G11140	NA	NA	NA	ERFVI	VI-AOG2	ERF063/CRF1
AT4G06746	NA	NA	NA	DREB II	IIa-AOG1	ERF007/RAP2.9/DEAR5
AT3G61630	NA	NA	NA	ERFVI	VI-AOG2	ERF067/CRF6
AT3G60490	NA	NA	NA	DREB III	IIId-AOG1	ERF035
AT3G57600	NA	NA	NA	DREB IV	IVb-AOG3	ERF051/DREB2F
AT3G54990	NA	NA	NA	AP2	AP2-AOG2	SMZ
AT3G54320	NA	NA	NA	ANT	ANT-AOG3	WRI1
AT3G50260	NA	NA	NA	DREB II	IIa-AOG1	ERF011/DEAR1/CEJ1
AT3G25890	NA	NA	NA	ERFVI	VI-L-AOG1	ERF119/CRF11
AT3G25730	NA	NA	NA	RAV	RAV-AOG2	RAV1-Like/EDF3
AT3G23240	NA	NA	NA	ERFIX	IXc-AOG3	ERF092/AtERF1
AT3G23230	NA	NA	NA	ERFIX	IXc-AOG2	ERF098/TDR1
AT3G23220	NA	NA	NA	ERFIX	IXc-AOG2	ERF095/ESE1
AT3G20840	NA	NA	NA	ANT	ANT-AOG9	PLT1
AT3G20310	NA	NA	NA	ERFVIII	VIIIa-AOG1	ERF083/AtERF7
AT3G16770	NA	NA	NA	ERFVII	VIIa-AOG1	ERF072/RAP2.3/AtEBP
AT3G16280	NA	NA	NA	DREB III	IIIe-AOG2	ERF036
AT3G15210	NA	NA	NA	ERFVIII	VIIIa-AOG4	ERF078/RAP2.5/AtERF4
AT3G14230	NA	NA	NA	ERFVII	VIIa-AOG4	ERF075/RAP2.2
AT3G11020	NA	NA	NA	DREB IV	IVa-AOG1	ERF044/DREB2B
AT2G47520	NA	NA	NA	ERFVII	VIIa-AOG2	ERF071/HRE2
AT2G46310	NA	NA	NA	ERFVI	VI-AOG2	ERF068/CRF5
AT2G44940	NA	NA	NA	DREB III	IIId-AOG1	ERF034
AT2G44840	NA	NA	NA	ERFIX	IXa-AOG1	ERF099/AtERF13
AT2G41710	NA	NA	NA	ANT	ANT-AOG1	AP2.01
AT2G40350	NA	NA	NA	DREB IV	IVa-AOG1	ERF047/DREB2H
AT2G40340	NA	NA	NA	DREB IV	IVa-AOG1	ERF048/DREB2C
AT2G40220	NA	NA	NA	DREB IV	IVb-AOG2	ERF052/ABI4
AT2G39250	NA	NA	NA	AP2	AP2-AOG2	SNZ
AT2G38340	NA	NA	NA	DREB IV	IVa-AOG1	ERF046/DREB2E/DREB19
AT2G36450	NA	NA	NA	DREB III	IIIb-AOG1	ERF024/HRD/HARDY
AT2G35700	NA	NA	NA	DREB III	IIId-AOG1	ERF038
AT2G33710	NA	NA	NA	ERFX	Xa-AOG2	ERF112
AT2G31230	NA	NA	NA	ERFIX	IXc-AOG4	ERF093/AtERF15
AT2G28550	NA	NA	NA	AP2	AP2-AOG2	TOE1/RAP2.7
AT2G25820	NA	NA	NA	DREB III	IIIe-AOG1	ERF042/ESE2
AT2G23340	NA	NA	NA	DREB II	IIa-AOG1	ERF008/DEAR3
AT2G22200	NA	NA	NA	DREBI	Ib-AOG3	ERF056/RAP2.4c
AT2G20880	NA	NA	NA	DREBI	Ia-AOG1	ERF053
AT2G20350	NA	NA	NA	ERFX	Xb-L-AOG1	ERF120
AT1G80580	NA	NA	NA	ERFVIII	VIIIb-AOG1	ERF084
AT1G79700	NA	NA	NA	ANT	ANT-AOG4	WRI4
AT1G78080	NA	NA	NA	DREBI	Ib-AOG3	ERF059/RAP2.4/WIND1
AT1G77640	NA	NA	NA	DREB II	IIb-AOG1	ERF013
AT1G77200	NA	NA	NA	DREB III	IIIe-AOG2	ERF037
AT1G75490	NA	NA	NA	DREB IV	IVb-AOG1	ERF049/DREB2D
AT1G74930	NA	NA	NA	DREB II	IIb-AOG4	ERF018/ORA47
AT1G72570	NA	NA	NA	ANT	ANT-AOG7	AIL1
AT1G72360	NA	NA	NA	ERFVII	VIIa-AOG3	ERF073/HRE1
AT1G71520	NA	NA	NA	DREB II	IIc-AOG1	ERF020
AT1G71450	NA	NA	NA	DREB III	IIIa-AOG2	ERF021/FUF1
AT1G71130	NA	NA	NA	ERFVI	VI-AOG2	ERF070/CRF8
AT1G68840	NA	NA	NA	RAV	RAV-AOG2	RAV2/TEM2/EDF2
AT1G68550	NA	NA	NA	ERFVI	VI-L-AOG1	ERF118/CRF10
AT1G64380	NA	NA	NA	DREBI	Ib-AOG1	ERF061/RAP2.4g
AT1G63030	NA	NA	NA	DREB III	IIIc-AOG2	ERF032/DDF2/DREB1E
AT1G53910	NA	NA	NA	ERFVII	VIIa-AOG4	ERF074/RAP2.12
AT1G53170	NA	NA	NA	ERFVIII	VIIIa-AOG4	ERF079/AtERF8
AT1G51190	NA	NA	NA	ANT	ANT-AOG9	PLT2
AT1G51120	NA	NA	NA	RAV	RAV-AOG1	RAV6
AT1G50680	NA	NA	NA	RAV	RAV-AOG1	RAV5
AT1G50640	NA	NA	NA	ERFVIII	VIIIa-AOG1	ERF082/AtERF3
AT1G49120	NA	NA	NA	ERFVI	VI-L-AOG1	ERF117
AT1G46768	NA	NA	NA	DREB II	IIa-AOG1	ERF006/RAP2.1/DEAR6
AT1G44830	NA	NA	NA	DREB II	IIb-AOG1	ERF014
AT1G43160	NA	NA	NA	ERFX	Xa-AOG1	ERF108/RAP2.6
AT1G36060	NA	NA	NA	DREBI	Ib-AOG3	ERF055/RAP2.4a/WIND3
AT1G33760	NA	NA	NA	DREB III	IIIa-AOG2	ERF022
AT1G28370	NA	NA	NA	ERFVIII	VIIIa-AOG4	ERF076/AtERF11
AT1G28360	NA	NA	NA	ERFVIII	VIIIa-AOG3	ERF081/AtERF12
AT1G28160	NA	NA	NA	ERFVIII	VIIIb-AOG3	ERF087
AT1G25560	NA	NA	NA	RAV	RAV-AOG2	RAV2-Like/TEM1/EDF1
AT1G25470	NA	NA	NA	ERFVI	VI-L-AOG1	ERF116/CRF12
AT1G24590	NA	NA	NA	ERFVIII	VIIIb-AOG2	ERF090/ESR2/DRNL
AT1G22985	NA	NA	NA	ERFVI	VI-AOG2	ERF069/CRF7
AT1G22810	NA	NA	NA	DREB II	IIc-AOG1	ERF019
AT1G22190	NA	NA	NA	DREBI	Ib-AOG3	ERF058/RAP2.4b/WIND2
AT1G21910	NA	NA	NA	DREB II	IIb-AOG1	ERF012/DREB26
AT1G19210	NA	NA	NA	DREB II	IIb-AOG4	ERF017
AT1G16060	NA	NA	NA	ANT	ANT-AOG4	WRI3
AT1G15360	NA	NA	NA	ERFV	Va-AOG2	ERF001/WIN1/SHN1
AT1G13260	NA	NA	NA	RAV	RAV-AOG2	RAV1/EDF4
AT1G12980	NA	NA	NA	ERFVIII	VIIIb-AOG2	ERF089/ESR1/DRN
AT1G12890	NA	NA	NA	ERFVIII	VIIIb-AOG4	ERF088
AT1G12630	NA	NA	NA	DREB III	IIIb-AOG2	ERF027
AT1G12610	NA	NA	NA	DREB III	IIIc-AOG2	ERF033/DDF1/DREB1F
AT1G06160	NA	NA	NA	ERFIX	IXc-AOG4	ERF094/ORA59
AT1G04370	NA	NA	NA	ERFIX	IXc-AOG2	ERF097/AtERF14
AT1G03800	NA	NA	NA	ERFVIII	VIIIa-AOG4	ERF077/AtERF10
AT1G01250	NA	NA	NA	DREB III	IIIa-AOG1	ERF023
Gene Name	preotein
AT2G46310_CRF5	MKSRVRKSKYTVHRKITSTPFDGFPKIVKIIVTDPCATDSSSDEENDNKSVAPRVKRYVDEIRFCDEDDEPKPARKAKKKSPAAAAENGGDLVKSVVKYRGVRQRPWGKFAAEIRDPSSRTRLWLGTFATAEEAAIGYDRAAIRIKGHNAQTNFLTPPPSPTTEVLPETPVIDLETVSGCDSARESQISLCSPTSVLRFSHNDETEYRTEPTEEQNPFFLPDLFRSGDYFWDSEITPDPLFLDEFHQSLLPNINNNNTVCDKDTNLSDSFPLGVIGDFSSWDVDEFFQDHLLDK*
AT4G27950_CRF4	MMMDEFMDLRPVKYTEHKTVIRKYTKKSSMERKTSVRDSARLVRVSMTDRDATDSSSDEEEFLFPRRRVKRLINEIRVEPSSSSTGDVSASPTKDRKRINVDSTVQKPSVSGQNQKKYRGVRQRPWGKWAAEIRDPEQRRRIWLGTFATAEEAAIVYDNAAIKLRGPDALTNFTVQPEPEPVQEQEQEPESNMSVSISESMDDSQHLSSPTSVLNYQTYVSEEPIDSLIKPVKQEFLEPEQEPISWHLGEGNTNTNDDSFPLDITFLDNYFNESLPDISIFDQPMSPIQPTENDFFNDLMLFDSNAEEYYSSEIKEIGSSFNDLDDSLISDLLLV*
AT4G23750_CRF2	MEAEKKMVLPRIKFTEHKTNTTTIVSELTNTHQTRILRISVTDPDATDSSSDDEEEEHQRFVSKRRRVKKFVNEVYLDSGAVVTGSCGQMESKKRQKRAVKSESTVSPVVSATTTTTGEKKFRGVRQRPWGKWAAEIRDPLKRVRLWLGTYNTAEEAAMVYDNAAIQLRGPDALTNFSVTPTTATEKKAPPPSPVKKKKKKNNKSKKSVTASSSISRSSSNDCLCSPVSVLRSPFAVDEFSGISSSPVAAVVVKEEPSMTTVSETFSDFSAPLFSDDDVFDFRSSVVPDYLGGDLFGEDLFTADMCTDMNFGFDFGSGLSSWHMEDHFQDIGDLFGSDPLLAV*
AT4G11140_CRF1	METEKKVSLPRILRISVTDPYATDSSSDEEEEVDFDALSTKRRRVKKYVKEVVLDSVVSDKEKPMKKKRKKRVVTVPVVVTTATRKFRGVRQRPWGKWAAEIRDPSRRVRVWLGTFDTAEEAAIVYDNAAIQLRGPNAELNFPPPPVTENVEEASTEVKGVSDFIIGGGECLRSPVSVLESPFSGESTAVKEEFVGVSTAEIVVKKEPSFNGSDFSAPLFSDDDVFGFSTSMSESFGGDLFGDNLFADMSFGSGFGFGSGSGFSSWHVEDHFQDIGDLFGSDPVLTV*
AT3G61630_CRF6	MERRTRRVKFTENRTVTNVAATPSNGSPRLVRITVTDPFATDSSSDDDDNNNVTVVPRVKRYVKEIRFCQGESSSSTAARKGKHKEEESVVVEDDVSTSVKPKKYRGVRQRPWGKFAAEIRDPSSRTRIWLGTFVTAEEAAIAYDRAAIHLKGPKALTNFLTPPTPTPVIDLQTVSACDYGRDSRQSLHSPTSVLRFNVNEETEHEIEAIELSPERKSTVIKEEEESSAGLVFPDPYLLPDLSLAGECFWDTEIAPDLLFLDEETKIQSTLLPNTEVSKQGENETEDFEFGLIDDFESSPWDVDHFFDHHHHSFD*
AT5G53290_CRF3	MDEYIDFRPLKYTEHKTSMTKYTKKSSEKLSGGKSLKKVSICYTDPDATDSSSDEDEEDFLFPRRRVKRFVNEITVEPSCNNVVTGVSMKDRKRLSSSSDETQSPASSRQRPNNKVSVSGQIKKFRGVRQRPWGKWAAEIRDPEQRRRIWLGTFETAEEAAVVYDNAAIRLRGPDALTNFSIPPQEEEEEEEPEPVIEEKPVIMTTPTPTTSSSESTEEDLQHLSSPTSVLNHRSEEIQQVQQPFKSAKPEPGVSNAPWWHTGFNTGLGESDDSFPLDTPFLDNYFNESPPEMSIFDQPMDQIFCENDDIFNDMLFLGGETMNIEDELTSSSIKDMGSTFSDFDDSLISDLLVA*
Glyma.04G238700	MEDSILCKHTVHRSVTKKLISPKKSSQTNSSTQTERRIVRISYTDPDATDSSSDEEGFPLVRKRMKRYVNQIEIETAAEKVVRKRPAGEPCRRPAKLHSGKKFRGVRQRPWGKWAAEIRDPARRVRLWLGTYDTAEEAAMVYDNAAIRLRGPDALTNFLTPPQRESPSQATTVAVTEEASGSGYDSGDDHCQHNLSSPTSVLHFRSNSESDQKSEQVLRECEGEGEFLALDNMPLPAWDEVFNFETPEYPPLLFQEGNFLHDYQSQMLGETVPFSSDQGFSDSSIVLADSLIDFDKACPPPSTLCQVDDFFQDILLASDPLVLL*
Glyma.13G040400	MEPQNRSNSILCKYTEHETVTKKHMKSKNNTSLSPKVISILMTDQYATDSSSDEERVTSRRRIKRYVNRIELQPAIKSVATRKRHVGDATKLRPPQVKVKNSGSVKKFRGVRQRPWGKWAAEIRDPVQRVRIWLGTFETAEEAALCYDNAAIMLRGPDALTNFGIRSKETLEKEERKELDEKEEIRTEKPEMKVVVKPEIETALVSCFYDSADEFCLNLSSPTSVLRFNESAELEKQYEPFPGRTEAHTVLEECQGQTVSFHESSEFMLQDMPWDDVFNFPVMFDEPVSHLFDETTRFSSSEVFSEEKFLPSATLCQVDDYFQDILLGSDPLVAL*
Glyma.02G236800	MNLATPSSHFDNDPPCKTKTKTQRRLLRIIVTDHDATDSDSDEEEEQQQQTTRVKREITQINMQLPLSYNSSFPSSSSYYSSASACTSSEQNLKCKRPNKKPPPFSAVVRRRNNKFRGVRQRPWGRWAAEIRDPTRRKRLWLGTFDTAEEAATEYDRAAVKLKGPNAVTNFPLTPEAAAEAPVVSVDNLSSDGGASYSDLVASPTSVLAYECDSTPFDGFRYLDVEAFEFHIDAPLSLPDVNVALTCHHGKKEEEVAFDEFDIDEFMTWPY*
Glyma.19G253100	MEARFSEQKVVVTYKHVKPGILNAAAPKVVRISVMDPYATDEEDEDEGLVNHPRMKKFVNEIRIVEKKSSTNSESAGVNRTNVSLRQHCKGKTGGSLEEKKLRGIRQRPWGRWAAEIRDPVKRRRVWLGTYDTAEEAAMVYDKAAITFRGSNARTNFIKPPSRDVVLTNETEARVTVSGENDSSEGSSHFPSPTSVLKLQPVEIMLEEFSETDLLSKEESSSQDSFLFLDSHSPSIDCYFNFETLPPVFLGETSVTQQPVFHGNFSDISHLVNEDFQSWNWDIDSYFSDPLSL*
Glyma.03G255500	MYHSLHFMEARFSERKVVTYKHVKPGDILNAAPKVVRISVMDPYATDDEDEDEGLVIHPRMKKFVNEIRIVEKSSTNCESAGVNRTSNVSLRQHYKGKTGDSLEKKRLRGVRQRPWGRWAAEIRDPVKRIRVWLGTYDTAEEAAMVYDKAAIAFRGSKALTNFIKPPTREDLCDCGPNETEASVAVSGENDSSEESHLSSPTSVLGLQSVELMLDEVSETDLPSKEESSSQDSFLFLDSHSPSIDCYFNFETLPPVFLHETSITQQPDFHDKFSDISHLVNEDFQSWNWDIDSYFSDPLLI*
Glyma.03G094700	MEYQRKTIITKLVKSSKFLPKVIRISVTDQDATDSSSDEEGEHARVKKVINEIKIVCVNNKKNHKNHDNDSSCCYANATKENESLRPQQQNINPLNKVGYMNQNQNLKQHKFRGVRQRPWGRWAAEIRDPTRRTRVWLGTFDTAEEAAMVYDKAAIKFRGAEAVTNFIKPRLKDHESVSLECDSVVNGTSSACASPTSVLVFQPWIEPPLLEETFKEEEVFNGLTTDVYCDDGFLFSNEALCDQPLPTTFCNVDCIDIPLDEDLESCKWDVDNYFSDDASWKQ*
Glyma.20G215700	MAAPPTKYTHHTKLLIPPGPEEDPPKHPYPKLLRITVTDTDATDSSSDEEQTNFSTRHRHRKLINEISIARASDTRRGQKFRGVRQRPLGKWSAEIRDPSQRGVRLWLGTYNTAEEAALVYDNAAIKLRGPHALTNFITPLLNEDTHNKFLFSPTSVLHVSENKVKVRGCSPVPDSVLFCDDDWSSEFLTASE*
Glyma.05G214400	MASSSIKNTHHLNRTKLFMEEDTLLKKKRHYPKLIRIRVTDADATDSSSDDDEPSVSSTRRRVKYFVNEITIQGGGGGGGCVNVVSRKRRFKAGAGAPSCRRRTGAKKFRGVRQRPWGKWAAEIRDPLRRVRLWLGTYDTAEEAAIVYDNAAIQLRGADALTNFVTPPRENRKTGYCSGEESRNNDLRSPTSVLGCRSVYEEAESVTANATGNDVVDESVTVVANDVVGPSSECEYSCVSEDSNNDKLKPESVFPIPNDVVFDFQSTLDMFDEGINTNNNNNVAESSIFLAEDFDFKGSFVNENLDLGFTSWHRECDNFQDIGDLFVWDPLVAL*
Glyma.11G199300	MSVQPPMKLHNHPFNPQASSSNFDGDPPCKTAGKTKPPHTKLLRVILTDHDATDSDSSGDDEDPKNTKKHKKVKRQITHITINLPFFSKSPTPTSTPSSSSLDPTRSTRPKKRLGVPRRRNKFRGVRQRPWGRWTAEIRDPTQRKRVWLGTFDTAEEAAAVYDEAAVKLKGPNAVTNFPLSAAGNTEHDTPPPETVFSGEGLSSPTSVLTYCDGDSTPFDGFRYGEVDAFGFEFDIDAPFSLTAVNLGVLSQRFGKEEFGEFDPNEFLTWPS*
Glyma.11G019000	MTAPPTKYTHHTKLLIPPEEDPPKHHYPRLVRITVTDTDATDSSSDEEEEQTYHCNSSTRHRHRKFVNEISIESCSSENDGVVSRKRIRRRSTTTPKATRASDTRRVSDGKKFRGVRQRPWGKWAAEIRDPARRVRLWLGTYDTAEEAALVYDNAAIKLRGPHALTNFITPPSGEETHCNSKNIFSPTSVLHCCSLSEEAESVTAKDDDYSSVSENKVKAESAFPPEIDFEFRACSTVPESLLFCDDDWSSEFLNSYEDFGFKSWHTDRNRDFFQDIDDLFVSDPLLAL*
Glyma.14G205600_GmCRF4a	_GmCRF4aMSVHAKLKHHPMNLASPSSHFEDDPPCKTKTKTQRRLLRIIITDHDATDSDSSDEEQQQQQQKTRRVNREITQINMQLPLSHNSSFSPSSSYYSSASTSSEQNLKCKRPNKKPPPSSAEARRRNKFRGVRQRQWGRWAAEIRDPTRRKRLWLGTFDTAEEAATEYDRAAVKLKGPNAVTNFPLAPEATAQSPPLAADNLSSDGGASYSDLVASPTSVLAYECDSTPFDGFRYLDVDAFGFHIDAPLSLPEVNVNVALTCHHGKKQEEAFDEFDLDEFMTWPY*
Glyma.14G123900	MEQQNSILCKYTEHQTVMKKHMKSKDNTFCSPKVISISLIDPYATDSSSDEENVMRRRRVKRYVNRIELQPAFKPVTTRKRHAGDAATLRKPPAKVTNSCRKFRGVRQRPWGKWAAEIRDPVQRVRIWLGTFKTAEEAALCYDNAAITLRGPDALTNFGRSRPEETPEKEEMVEKEEFTSGKPEMKVVVKPETQVSVSVSGCYDSGDECCLNLSSPTSVLQFSAEPYKPDEPFPGSTETRTVVEECHGETVSFSDSSECILKDMPWDDVFNFPVMFDEPLSHLFDETTPFSISDGFGDEKFLPSSTLCQVDDYFQDILLGSDPLVVL*
Glyma.08G020900	MASSSIKHTHHLNRTKLFMKEETLLKKKHHYPKIIRIRVTDADATDSSSDDDEPSMSSTRRRVKNFVNEITIQGGGGGGGDVNVVSKKRRFKSGAGAPLCRRKTGAKKFRGVRQRPWGKWAAEIRDPSRRVRLWLGTYDTAEEAAIVYDNAAIQLRGADALTNFITPPPENRKTGYCSGEESRNNDDLRSPTSVLGRCSVSEEAVTANDVFGGSSECEYSCVSESVFPIPNEVVFDFESTLDMFDEGINNVVAETSIFLAEDLDLGFTSWHRECDNFQDIGGDLFVWDPLVAL*
Glyma.01G224100	MTAPPSKYTHHSKLLIPSEEDPPKHPYPRLVRITVTDTEATDSSSDEEQHTSTRHRHRKFVNEISIESSCASENDGAASRKRIRRRSTATPKGRASDTRLVSNGKKFRGVRQRPWGKWAAEIRDPSRRVRLWLGTYDTAEEAALVYDNAAIRLRGPHALTNFITPPATCHNTDPPPVANGYGYASGEETNDNNNNLFSPTSVLHSCSLSEEAESVRGKDDEYSSVSMSRVKAESPFPVPSEIEFDFRGISPVPESVLFYDDDWSSEFLTACEDFGFNRNRDFFQDIDDLFVSDPLLAL*
Glyma.06G125100	MEDSILCKHTVHHTVTKKLISPKKSSQTNSTTERRIVRISYTDPDATDSSSDEEGFPFVRQRMKRYVNQIEIETAAAEKVVRKRPAGEACRRPAKLHSGKKFRGVRQRPWGKWAAEIRDPARRVRLWLGTYDTAEEAAMVYDNAAIRLRGPDALTNFVTPPKRDSPSPSPPPAAAETPAEVCEMKVVVTEEASGSGYDSSEDHCHHNLSSPTSVLQFRSNSSEENSESQQKAEQVLRECEGETETSLFEETGEFLALDNMPLPAWDDVFNFETPEYPPLLFQEEENLNLLHQSQMLGETVQFSSEEGFSDESSIMLADSLIDFDRACPSPSSLCQVDDFFQDILFASDPLVLL*
Glyma.16G079600	MECARKTITTKFMKSSKFFPKVVRISVTDQDATDSSSDEEAERVKVKKIVVNEIVCVNNNKKRHNNDNSGCCYSTKDNESLKQQRQQSLVSLGEEGYMDSKQSLKQHKFRGVRQRPWGRWAAEIRDPLRRTRVWLGTFDTAEEAAMVYDKAAIKFRGAEAVTNFIKPPLKDDAVSLEICESVVSGTSCACDSPTSVLVFQPWMEPPLLEETFKEVFSGLTDGYDDGFLFSNDSLCDQPLPTTFSNADCIIPLDEDFESCKWVVDNYFSDDTSLQ*
LOC_Os01g46870	MSRSRTVRIFWDDPDLTDSSGEDEGCGGRRVGSMVRELPPAQMPVAQAGFAPAAAAAAAALPEQCSGGDGDMGRRVVGGGCTVGVGRRRLTKDGGPGAPSTKFRGVRRRPWGKFAAEIRDPWRGVRVWLGTFDTAEEAARVYDNAAIQLRGPSATTNFSASTNSAGAQDPVAVGYESGAESSPAVSSPTSVLRKVPSLCSLAEDKDDYEAGPCEPATAAGSNLTVLEEEELGEFVPFEDAPVYGGSSFWDFEPESGFLYAEPSSPETPWDAGATSSGEAQDYFQDLRDLFPLNPLPAIF*
LOC_Os01g12440	MMMWPLEMEEGFVALKRTEHVEVTSLAVAVEATPSAKGGKGKVVVGGGGAGGGVGPTRVRVFCDDFDATDSSSDEDEEEVTARRRVKRYVQEIRLQRAAAVAVPPVKVKGEEVFPAAVSAKMAEAAKARVVLAAGRKRKAGGVDGAEPRFRGVRRRPWGKYAAEIRDPWRRVRVWLGTFDTAEEAAKVYDTAAIQLRGRDATTNFNQSGDSASLDVPPEVAERVPQPPGASKNASPATSYDSGEESHAAAASPTSVLRSFPPSAVVATADTANKKQPPPPPLVVRETDESVDVFGCSFSDDGGFAGELPPLYTDFDLLADFPEPPLDFLSNLPVEPFSLAPFSSNNGSPDLHLDDAPSPAAAQVDDFFQDITDLFQIPVV*
LOC_Os06g06540	MVEVIVEKKARRIVRGRWHVEASNEAAAAAPAVAAPAPRVVRVLCRDHDATDSSGDDDGEDDAPRRARLLVHEIHVARQPVAMSPAAASSSQRRRVGPMKRTESAVDATMDATAAAPERKFRGVRKRPWGKYGAEIRVSQQSARVWLGTFDTAEEAARVYDHAALRLRGPSATTNFPMTPAAPSPPPSRATYAGAASGYDESSDESQLVGSPVSVLRPMPARATAKKEAKEEDDSAPDILGISAGDGLISPFTCDVLNFPPPDEDMFGGGISFGEPTPPPMVFDDDCMARLGHAPNDDEHPVTSSSFLDGDLGDLPSWTEVDGFFSDVGGDDLFAAEPFPAL*
Zm00001d034605	MGTNPHLQELAASAVAASEPPPRARVVRILVHDADATDSSSSEDEAPPLLPRRRSRGGSSSLSVRRRVMEPAGASSAVRFRGVRRRPWGRWAAEIREPHNRRRLWLGTFDTAEEAANAYDAANIRFRGVSATTNFPAARYSPPPKPAKPIISLTPEPGKVITLPPVPVKPTFPVQVKEVGGSWGGLVKGARSEVKAFAPKPVWKMIPRVHQKFPGCADGSGLRAVHAASIYVEEVGGG*
Zm00001d036251	MPEAATVVYTERKRKIKKEPAETATVPKLVRVFCDDLDATDSSGDDEAAASGGVAARGARKFILEIFTEGHRKGCNATATIPAPGGGKRKAPATTLAPEEPRYRGVRRRPWGKYAAEIRDPHKGERLWLGTFDTAEEAAREYDSAARRLRGPSATTNFPAPPTPSDRVPAVRELSSAEESDSDETHTVSSPVSVLQEAMPGETAAAVGPPAPKPTDDAADPAAAKKDAPRGDGGLSHFSADAPLPQLGDDAFSFAPLGGVPFDDLPAPQLDYCYLADDSALDLGSLPMWPGVDGCQFSDISDDDLFALSGPGAPN*
Zm00001d044004	MSRPRTVRIFWDDPDLTDSSSEEEGCGTRRVGRMVRELPPMAGAAAAAPVPDQCNAGDGDRGRRLGVAAPGACSGARRRLAKTGPSTKFRGVRRRPWGKFAAEIRDPWRGVRVWLGTFDTAEEAARVYDTAAIQLRGANATTNFSAAANSGSRAGQRDPATPGYESGTESSPAASSPTSVLRKVPSLSSLAEDDSCAAPCEPAAGCRSLAVLEEEELGQFVPFEDAPVYATSGFWDFEPDAGFLYAEPSSPEASWNAAAAAEPASSDDAPSWAASPVQENDYFQGLRDLFPLNPLPAIF*
Zm00001d039324	MWPMEEEMFLAVKRTEHVEVTSRAMDSAPAAGPRTVRVFCDDNDATDSSGDEAEGAAARRRVKRYVQEIRLQRAVPVKEEAASARAVAGERPRPLALPGRKRKSDGAGAGAEPRFRGVRRRPWGKYAAEIRDPWRRVRVWLGTFDTAEEAAKVYDSAAIQLRGADATTNFEHAAVPVPVPDEVAGRLPQPPPAPASKNASSSATSSYDSGEESHAAAASPTSVLRTFPPSSAAADATCKKPAPAAETDESTGVGGSRSSVYAYPFFANDDCFGGDFPPLYTDFDLLADFPEPTLDFLADIPEEKLPPLPEPFPAASPDECPSDAEAASPARWQQVDDFFQDITDLFQIDPLPVV*
Zm00001d008968	MWPMEEEEVFVTVRRTEHVDVTSRAVVVAAGRAAVAGPRTVRVFCDDYDATDSSGDEAEEEEEKKAARRRVKRYVQEIHLERAAKEEEEATAAASLGAVLPGPKRKRKPDGEASEPRFRGVRRRPWGKYAAEIRDPWRRVRVWLGTFDTAEEAAKVYDSAAVQLRGRDATTNFQQQVDPERLSQPAASKSAATSTYDSGEESVTAVASPTSVLRSFPPSADAGGTRSKAAARNPETGDSTIVFGCPFSLASELPALYTEFDLLADLPLDFLADAPEVEALSLPPFSACTPEEEEECPSDAVRWRQVDELFQDITDLFQIDPLPVA*
Zm00001d011499	MSRSRTVRIFWDDPDLTDSSGDDEGCGARRVGRMVRELAPAPAPAPAALPVPDQCNPGDGDRGRKAGVAGPGVCSGARRRLAKGAGGAASTKFRGVRRRPWGKFAAEIRDPWRGVRVWLGTFDTAEEAARVYDAAAVQLRGANATTNFSASAATNCGSGSGAGAGQDPATTPAAGYESGAESSPTSVLRKVPSLSSLAEDDSDAPAAQRRSLAVLEEEELGEFVPFEDAPVYATSGFWDFEPDAGFLYAEPSSPEASWNAAAAVAEPASSDDAPSWAASPVQENDYFQDLRDLFPLNRLPAIF*
Zm00001d045262	MVEAAAVSRSRPKIKQEPAETTAICKLVRVFCDDRDSTDSSGDEAAAGGGAGAAAGARKFLVEISVEKHQPRCNAMAPAGRAAGGGKRKAAAAGTPAEPRYRGVRRRPWGRYAAEIRDPHKGERLWLGTFDTAEEAARRYDSETRRLRGPSAITNFPATPDDRVPLPAPALSLHGVAAVGEHSSAEEESCDESQLVVGSPVSVLRAMPDETARATLPPKIADAAAGCATKKDAPDGRGGLSPFSADDALLPQLGEDAFSFGGVPFDDDLPTPQLGLDYLAADPALDLGSLPMWPGVDGCRFSDIGDDDLFSLPAL*
