# Supplementary material for: An APETALA2/ethylene responsive factor transcription factor GmCRF4a regulates plant height and auxin biosynthesis in soybean
Source: Front Plant Sci. 2022 Sep 6;13:983650. doi: 10.3389/fpls.2022.983650 (PMC9485679; doi:10.3389/fpls.2022.983650)
Supplement: Supplementary file 2 [file Table_2.XLSX]

## Sheet: Sheet1
Tissue	TPM
Shoot	2.99553
Root	2.74528
Flower	2.61115
Cotyledon	3.45235
Endosperm	2.83061
Hypocotyl	5.14161
Seed	1.94643
Seed Coat	3.69894
Pod	1.60829
Suspensor	5.52743
Embryo	2.93491
Seedling	4.35036
Callus	3.47898
Leaves	2.57561
Nodule	3.40127
