# Supplementary material for: An APETALA2/ethylene responsive factor transcription factor GmCRF4a regulates plant height and auxin biosynthesis in soybean
Source: Front Plant Sci. 2022 Sep 6;13:983650. doi: 10.3389/fpls.2022.983650 (PMC9485679; doi:10.3389/fpls.2022.983650)
Supplement: Supplementary file 3 [file Table_3.XLSX]

## Sheet: Sheet1
Gene Name	Primer Forward	Primer Reverse	Locus
E1	CACTCAAATTAAGCCCTTTCA	TTCATCTCCTCTTCATTTTTGTTG	Glyma.06G207800
GmFT5a	AGCCCGAACCCTTCAGTAGGGA	GGTGATGACAGTGTCTCTGCCCA	Gyma.16G044100
GmActin11	CGGTGGTTCTATCTTGGCATC	GTCTTTCGCTTCAATAACCCTA	Glyma.18G290800
GmaYUC4-a	GGCAACACAGAACCTACGAC	ATGGAGGGAACAACAGGCTC	Glyma.04G070100
GmaYUC4-c	TCAACATCCGCCCCA	TAGCAACCACAAGCCAC	Glyma.06G072100
GmaYUC10-b	GGTTGAGTTTGCTGCGTATGA	TCTCCATCCCAGAGTTACCAC	Glyma.04G213600
GmIAA14a	ACAAGAGAAAGAAGGGGG	GCTTATCAGCAGAAAGGAAA	Glyma.10G180100
GmSAUR14a	ATCCAATGGGTGGTCTAAC	TTGCCTCATCTAATCTATCT	Glyma.06G278400
Glyma.02G236800	ACTCGTTGGAGCTTTGGA	CGCCGTTTCAGGTGGTAG	Glyma.02G236800
Glyma.14G123900	TGAAAGTCGTCGTGAAACC	CTGGAGAACCGAAGTGGG	Glyma.14G123900
GmCRF4a	CACGGGAAGAAGCAGGAG	GCAATGCAAACAGGGTGT	Glyma.14G205600
